# Supplementary figures and images for: Towards Detecting Pneumonia Progression in COVID-19 Patients by Monitoring Sleep Disturbance Using Data Streams of Non-Invasive Sensor Networks
Source: MDPI journal article supplement (doi:10.3390/s21093030), 2021-04-26

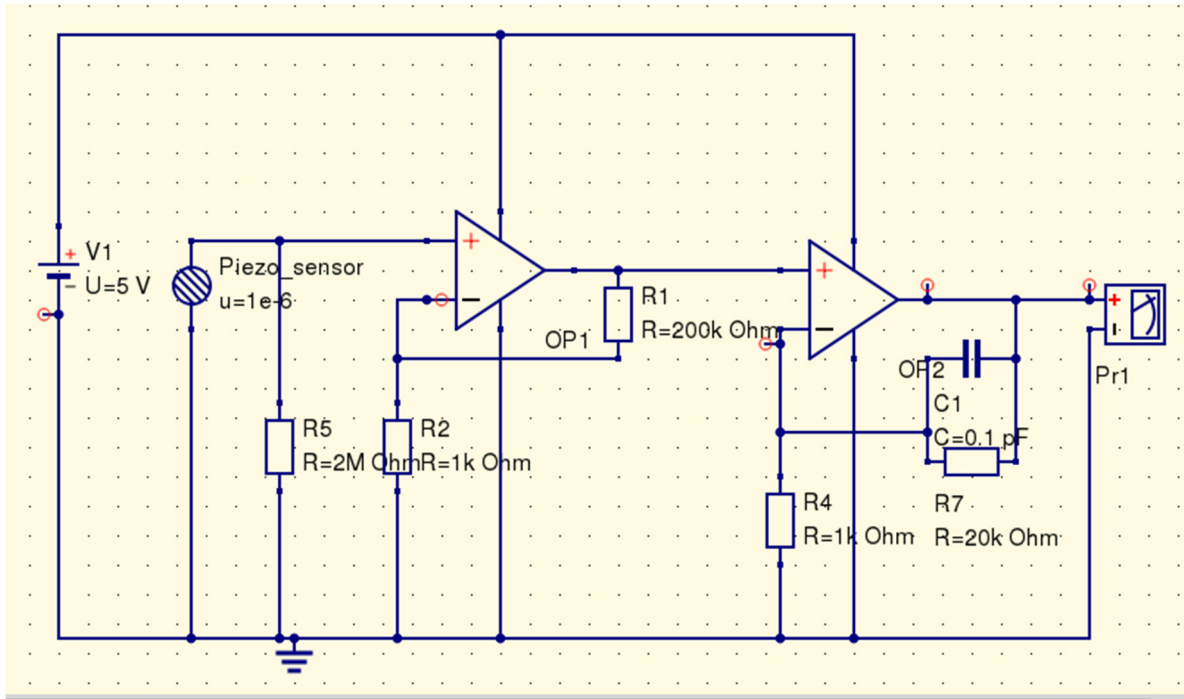

**Figure S1.** Amplifier circuit for piezoelectric sensor.

Supplement: s1 [file s1]
